# Supplementary material
Source: publisher site journal article supplement (https://www.dovepress.com/article/381160)
Supplement: Supplementary file 1 [file get_supplementary_file.php]

Supplementary table 1. Baseline characterization of patients according to distribution of red cell distribution

width in quartiles

| Characteristics | first interquartile | Second interquartile | Third interquartile | Fourth interquartile |
| --- | --- | --- | --- | --- |
| Cases, n (%) | 373 (24.8) | 372 (24.7) | 376 (25.0) | 384 (25.5) |
| Age, year, mean (SD) | 58.76 (10.48) | 61.81 (11.35) | 65.41 (10.98) | 66.72 (11.15) |
| Age group, n (%) |  |  |  |  |
| < 45 years | 26 (7.0) | 15 (4.0) | 10 (2.7) | 11 (2.9) |
| 45-64 | 237 (63.5) | 206 (55.4) | 164 (43.6) | 144 (37.5) |
| ≥ 65 years | 110 (29.5) | 151 (40.6) | 202 (53.7) | 229 (59.6) |
| Severity, n (%) |  |  |  |  |
| Mild | 322 (86.3) | 306 (82.3) | 323 (85.9) | 308 (80.2) |
| Moderate | 48 (12.9) | 62 (16.7) | 38 (10.1) | 63 (16.4) |
| Severe | 3 (0.8) | 4 (1.1) | 15 (4.0) | 13 (3.4) |
| Risk factors, n (%): |  |  |  |  |
| Hypertension | 289 (77.5) | 280 (75.3) | 289 (76.9) | 277 (72.1) |
| Diabetes mellitus | 161 (43.2) | 147 (39.5) | 93 (24.7) | 86 (22.4) |
| Atrial fibrillation | 4 (1.1) | 6 (1.6) | 14 (3.7) | 8 (2.1) |
| Cerebral atherosclerotic stenosis | 53 (14.2) | 63 (16.9) | 53 (14.1) | 47 (12.2) |
| Smoking | 129 (34.6) | 134 (36.0) | 138 (36.7) | 166 (43.2) |
| Drinking | 64 (17.2) | 59 (15.9) | 62 (16.5) | 92 (24.0) |
| Laboratory tests, mean (SD) |  |  |  |  |
| FBG, mmol/L | 7.18 (3.28) | 6.70 (2.70) | 6.27 (2.67) | 5.83 (2.08) |
| TC, g/L | 4.97 (1.06) | 5.03 (1.06) | 4.91 (0.96) | 4.85 (0.93) |
| TG, g/L | 2.12 (1.92) | 1.65 (0.90) | 1.55 (0.90) | 1.41 (0.84) |
| HDL-C, g/L | 1.00 (0.26) | 1.09 (0.26) | 1.12 (0.84) | 1.15 (0.31) |
| LDL-C, g/L | 2.99 (0.82) | 3.08 (0.83) | 3.02 (0.81) | 2.91 (0.83) |
| CRP, mg/L | 5.43 (14.68) | 6.86 (25.99) | 5.51 (16.44) | 6.95 (17.90) |
| Neurological function, median (range): |  |  |  |  |
| NIHSS | 3(0，25) | 3(0，20) | 4(0，28) | 4(0，31) |
| BI | 80(0，100) | 75(0，100) | 75(1，100) | 70(0，100) |
| mRS | 2(0，5) | 2(0，5) | 2(0，5) | 3(0，5) |

Supplementary table 2.1. Univariate analysis of influencing factors for 3-month prognosis.

| Characteristics | Mortality | | | Recurrence | | | Dependence | | |
| --- | --- | --- | --- | --- | --- | --- | --- | --- | --- |
| YES | NO | P | YES | NO | P | YES | NO | P |
| Cases, n (%) | 26 | 1527 |  | 106 | 1421 |  | 1421 | 106 |  |
| Age, year, mean (SD) | 72.38  (12.66) | 63.04  (11.3) | < 0.001 | 66.62 (11.44) | 62.77(11.25) | 0.001 | 66.62(11.44) | 62.77  (11.25) | 0.001 |
| Age group, n (%) |  |  | 0.017 |  |  | 0.009 |  |  | 0.009 |
| < 45 years | 0(0) | 64(4.2) |  | 2(1.9) | 62(4.4) |  | 62(4.4) | 2(1.9) |  |
| 45-64 | 7(26.9) | 768(50.3) |  | 41(38.7) | 727(51.2) |  | 727(51.2) | 41(38.7) |  |
| ≥ 65 years | 19(73.1) | 695(45.5) |  | 63(59.4) | 632(44.5) |  | 632(44.5) | 63(59.4) |  |
| Severity, n (%) |  |  | <0.001 |  |  | 0.003 |  |  | 0.003 |
| Mild | 13(50) | 1286(84.3) |  | 79(74.5) | 1207(85.1) |  | 1207(85.1) | 79(74.5) |  |
| Moderate | 10(38.5) | 208(13.6) |  | 21(19.8) | 187(13.2) |  | 187(13.2) | 21(19.8) |  |
| Severe | 3(11.5) | 31(2.0) |  | 6(5.7) | 25(1.8) |  | 25(1.8) | 6(5.7) |  |
| Risk factors, n (%): |  |  |  |  |  |  |  |  |  |
| Hypertension | 16(61.5) | 1147(75.1) | 0.113 | 79(74.5) | 1068(75.2) | 0.885 | 1068(75.2) | 79(74.5) | 0.885 |
| Diabetes mellitus | 11(42.3) | 485(31.8) | 0.253 | 39(36.8) | 446(31.4) | 0.249 | 446(31.4) | 39(36.8) | 0.249 |
| Atrial fibrillation | 1(3.8) | 33(2.2) | 0.560 | 1(0.9) | 32(2.3) | 0.371 | 32(2.3) | 1(0.9) | 0.371 |
| Cerebral atherosclerotic stenosis | 3(11.5) | 219(14.3) | 0.686 | 21(19.8) | 198(13.9) | 0.096 | 198(13.9) | 21(19.8) | 0.096 |
| Smoking | 9(34.6) | 578(37.9) | 0.736 | 32(30.2) | 546(38.4) | 0.092 | 546(38.4) | 32(30.2) | 0.092 |
| Drinking | 4(15.4) | 280(18.3) | 0.699 | 14(13.2) | 266(18.7) | 0.157 | 266(18.7) | 14(13.2) | 0.157 |
| Laboratory tests, mean (SD) |  |  |  |  |  |  |  |  |  |
| FBG, mmol/L | 7.87(2.95) | 6.44(2.73) | 0.024 | 6.74(3.32) | 6.41(2.69) | 0.302 | 6.74(3.32) | 6.41(2.69) | 0.302 |
| TC, g/L | 4.51(0.97) | 4.93(1) | 0.050 | 5.04(1.09) | 4.92(1) | 0.254 | 5.04(1.09) | 4.92(1) | 0.254 |
| TG, g/L | 1.12(0.4) | 1.69(1.25) | 0.031 | 1.61(0.87) | 1.7(1.27) | 0.495 | 1.61(0.87) | 1.7(1.27) | 0.495 |
| HDL-C, g/L | 1.16(0.28) | 1.09(0.49) | 0.502 | 1.09(0.31) | 1.09(0.5) | 0.977 | 1.09(0.31) | 1.09(0.5) | 0.977 |
| LDL-C, g/L | 2.65(0.88) | 2.99(0.8) | 0.051 | 3.05(0.9) | 2.99(0.79) | 0.463 | 3.05(0.9) | 2.99(0.79) | 0.463 |
| CRP, mg/L | 21.72(36.91) | 5.92(18.65) | 0.001 | 9.22(23.22) | 5.71(18.32) | 0.114 | 9.22(23.22) | 5.71(18.32) | 0.114 |
| RDW-SD，fl | 44.93(4.02) | 43.39(4.37) | 0.100 | 44.57(4.32) | 43.3(4.36) | 0.005 | 44.57(4.32) | 43.3(4.36) | 0.005 |

Supplementary table 2.2. Univariate analysis of influencing factors for 12-month prognosis.

| Characteristics | Mortality | | | Recurrence | | | Dependence | | |
| --- | --- | --- | --- | --- | --- | --- | --- | --- | --- |
| YES | NO | P | YES | NO | P | YES | NO | P |
| Cases, n (%) | 50 | 1367 |  | 336 | 1057 |  | 1051 | 316 |  |
| Age, year, mean (SD) | 72.32(10.66) | 62.86(11.29) | <0.001 | 66.78(11.18) | 61.86(11.1) | <0.001 | 66.47(11.25) | 61.78(11.07) | <0.001 |
| Age group, n (%) |  |  | <0.001 |  |  | <0.001 |  |  | <0.001 |
| < 45 years | 0(0) | 58(4.2) |  | 6(1.8) | 52(4.9) |  | 52(4.9) | 6(1.9) |  |
| 45-64 | 12(24) | 694(50.8) |  | 126(37.5) | 573(54.2) |  | 572(54.4) | 122(38.6) |  |
| ≥ 65 years | 38(76) | 615(45) |  | 204(60.7) | 432(40.9) |  | 427(40.6) | 188(59.5) |  |
| Severity, n (%) |  |  | <0.001 |  |  | <0.001 |  |  | <0.001 |
| Mild | 24(48) | 1158(84.8) |  | 249(74.1) | 921(87.3) |  | 917(87.4) | 241(76.3) |  |
| Moderate | 19(38) | 182(13.3) |  | 71(21.1) | 121(11.5) |  | 119(11.3) | 63(19.9) |  |
| Severe | 7(14) | 25(1.8) |  | 16(4.8) | 13(1.2) |  | 13(1.2) | 12(3.8) |  |
| Risk factors, n (%): |  |  |  |  |  |  |  |  |  |
| Hypertension | 34(68) | 1020(74.6) | 0.293 | 251(74.7) | 789(74.6) | 0.983 | 786(74.8) | 234(74.1) | 0.792 |
| Diabetes mellitus | 18(36) | 432(31.6) | 0.512 | 120(35.7) | 319(30.2) | 0.057 | 318(30.3) | 114(36.1) | 0.051 |
| Atrial fibrillation | 2(4) | 25(1.8) | 0.270 | 11(3.3) | 15(1.4) | 0.029 | 15(1.4) | 10(3.2) | 0.043 |
| Cerebral atherosclerotic stenosis | 7(14) | 181(13.2) | 0.876 | 46(13.7) | 139(13.2) | 0.799 | 139(13.2) | 42(13.3) | 0.976 |
| Smoking | 15(30) | 510(37.3) | 0.293 | 97(28.9) | 420(39.7) | <0.001 | 419(39.9) | 91(28.8) | <0.001 |
| Drinking | 6(12) | 255(18.7) | 0.233 | 42(12.5) | 215(20.3) | 0.001 | 215(20.5) | 40(12.7) | 0.002 |
| Laboratory tests, mean (SD) |  |  |  |  |  |  |  |  |  |
| FBG, mmol/L | 7.41(2.75) | 6.39(2.73) | 0.028 | 6.6(3.01) | 6.34(2.63) | 0.180 | 6.59(3.05) | 6.33(2.62) | 0.193 |
| TC, g/L | 4.8(1.08) | 4.92(1) | 0.440 | 4.96(1.09) | 4.92(0.98) | 0.523 | 4.96(1.1) | 4.91(0.98) | 0.523 |
| TG, g/L | 1.25(0.62) | 1.71(1.29) | 0.020 | 1.63(0.99) | 1.72(1.36) | 0.251 | 1.65(1) | 1.72(1.36) | 0.373 |
| HDL-C, g/L | 1.11(0.27) | 1.09(0.5) | 0.714 | 1.12(0.9) | 1.08(0.28) | 0.165 | 1.12(0.93) | 1.08(0.28) | 0.156 |
| LDL-C, g/L | 2.92(0.96) | 2.99(0.79) | 0.527 | 3.03(0.87) | 2.99(0.77) | 0.404 | 3.03(0.87) | 2.98(0.77) | 0.392 |
| CRP, mg/L | 21.53(35.8) | 5.62(18.2) | 0.000 | 9.61(21.65) | 4.78(17.65) | 0.000 | 8.61(19.7) | 4.77(17.67) | 0.003 |
| RDW-SD，fl | 44.78(4.27) | 43.34(4.44) | 0.031 | 44.13(4.13) | 43.12(4.52) | 0.000 | 44.06(4.1) | 43.12(4.52) | 0.001 |

Supplementary table 2.3. Univariate analysis of influencing factors for 36-month prognosis.

| Characteristics | Mortality | | | Recurrence | | | Dependence | | |
| --- | --- | --- | --- | --- | --- | --- | --- | --- | --- |
| YES | NO | P | YES | NO | P | YES | NO | P |
| Cases, n (%) | 85 | 928 |  | 462 | 533 |  | 515 | 413 |  |
| Age, year, mean (SD) | 72.79(10.25) | 62.55(11.11) | <0.001 | 64.89(11.3) | 61.78(11.13) | <0.001 | 61.38(11) | 64.02(11.08) | <0.001 |
| Age group, n (%) |  |  | <0.001 |  |  | <0.001 |  |  | 0.001 |
| < 45 years | 1(1.2) | 40(4.3) |  | 14(3) | 27(5.1) |  | 27(5.2) | 13(3.1) |  |
| 45-64 | 17(20.0) | 480(51.7) |  | 201(43.5) | 291(54.6) |  | 288(55.9) | 192(46.5) |  |
| ≥ 65 years | 67(78.8) | 408(44) |  | 247(53.5) | 215(40.3) |  | 200(38.8) | 208(50.4) |  |
| Severity, n (%) |  |  | <0.001 |  |  | 0.001 |  |  | 0.011 |
| Mild | 54(63.5) | 783(84.6) |  | 362(78.7) | 465(87.2) |  | 451(87.6) | 332(80.8) |  |
| Moderate | 22(25.9) | 128(13.8) |  | 82(17.8) | 62(11.6) |  | 59(11.5) | 69(16.8) |  |
| Severe | 9(10.6) | 15(1.6) |  | 16(3.5) | 6(1.1) |  | 5(1) | 10(2.4) |  |
| Risk factors, n (%): |  |  |  |  |  |  |  |  |  |
| Hypertension | 62(72.9) | 701(75.5) | 0.595 | 348(75.3) | 404(75.8) | 0.863 | 390(75.7) | 311(75.3) | 0.881 |
| Diabetes mellitus | 26(30.6) | 289(31.1) | 0.916 | 160(34.6) | 146(27.4) | 0.014 | 144(28) | 145(35.1) | 0.019 |
| Atrial fibrillation | 3(3.5) | 14(1.5) | 0.165 | 11(2.4) | 5(0.9) | 0.071 | 4(0.8) | 10(2.4) | 0.041 |
| Cerebral atherosclerotic stenosis | 11(12.9) | 121(13) | 0.980 | 64(13.9) | 66(12.4) | 0.493 | 65(12.6) | 56(13.6) | 0.673 |
| Smoking | 23(27.1) | 350(37.7) | 0.051 | 153(33.1) | 215(40.3) | 0.019 | 208(40.4) | 142(34.4) | 0.061 |
| Drinking | 5(5.9) | 176(19) | 0.003 | 79(17.1) | 100(18.8) | 0.496 | 100(19.4) | 76(18.4) | 0.695 |
| Laboratory tests, mean (SD) |  |  |  |  |  |  |  |  |  |
| FBG, mmol/L | 6.67(2.99) | 6.23(2.53) | 0.211 | 6.39(2.69) | 6.13(2.46) | 0.159 | 6.1(2.36) | 6.41(2.73) | 0.102 |
| TC, g/L | 4.87(1.05) | 4.91(1.02) | 0.729 | 4.9(1.08) | 4.92(0.97) | 0.712 | 4.92(0.97) | 4.89(1.08) | 0.658 |
| TG, g/L | 1.38(0.83) | 1.7(1.36) | 0.042 | 1.61(1) | 1.74(1.57) | 0.138 | 1.75(1.59) | 1.64(1) | 0.234 |
| HDL-C, g/L | 1.31(1.72) | 1.07(0.28) | 0.000 | 1.09(0.77) | 1.09(0.28) | 0.992 | 1.09(0.28) | 1.05(0.28) | 0.023 |
| LDL-C, g/L | 2.91(0.85) | 2.99(0.78) | 0.391 | 3(0.81) | 2.98(0.77) | 0.658 | 2.97(0.77) | 3.01(0.81) | 0.508 |
| CRP, mg/L | 16.28(29.18) | 5.82(20.23) | 0.000 | 7.94(23.93) | 4.99(17.37) | 0.035 | 4.95(17.6) | 6.88(23.01) | 0.172 |
| HCY, μmol/L | 44.53(5.95) | 43.19(4.63) | 0.015 | 43.51(4.62) | 43.07(4.89) | 0.150 | 43.1(4.68) | 43.3(4.57) | 0.520 |
| RDW-SD，fl | 6.67(2.99) | 6.23(2.53) | 0.211 | 6.39(2.69) | 6.13(2.46) | 0.159 | 6.1(2.36) | 6.41(2.73) | 0.102 |
